# Supplementary material for: Patterns of Genetic and Reproductive Traits Differentiation in Mainland vs. Corsican Populations of Bumblebees
Source: PLoS One. 2013 Jun 6;8(6):e65642. doi: 10.1371/journal.pone.0065642 (PMC3675023; doi:10.1371/journal.pone.0065642)
Supplement: Table S4 — MMS data matrix (relative amounts of each compound) of B. vestalis. (XLS) [file pone.0065642.s004.xls]

## Sheet: Vestalis_group
		Vest01	Vest02	Vest03	Vest04	Vest05	Vest06	Vest07	Vest08	Vest09	Vest10	Vest11	Vest12	Vest13	Vest14	Vest15	Vest16	Vest17	Vest18	Vest19	Vest20	Vest21	Vest22	Vest23	Vest24	Vest25	Vest26	Vest27	Vest28	Vest29	Pere01	Pere02	Pere03	Pere04	Pere05	Pere06	Pere07	Pere08	Pere09	Pere10	Pere11	Pere12	Pere13	Pere14	Pere15	Pere16	Pere17	Pere18	Pere19
	MW	N. France I	N. France I	N. France I	N. France I	N. France I	N. France II	Czech R.	Czech R.	Slovenia	Denmark	Sweden II	NW. Italy I	NW. Italy I	E. Germany	E. Germany	Belgium I	Roumania I	Roumania I	Roumania I	SW France II	SW France II	Poland	Poland	Netherlands	Belgium I	W France	Poland	Netherlands	Belgium I	Corsica	Corsica	Corsica	Corsica	Corsica	Corsica	Corsica	Corsica	Corsica	Corsica	Corsica	Corsica	Corsica	Corsica	Corsica	Corsica	Corsica	Corsica	Corsica
Farnesol	222	0.038538	0	0	0	0	0.0593897	0	0	0	0.0752491	0.0145785	0.0147019	0	0	0.0520035	0.00886715	0.0193837	0.0207086	0	0	0	0	0	0	0	0	0	0	0	0	0	0.0448597	0.109971	0.0358568	0.0926236	0.0384971	0.217215	0.0612633	0.0311197	0	4.01348	0	0.30484	0	0	0	0	0
Hexadecen-1-ol	240	0.200118	0.524216	0.43343	0.51038	0.0680814	0.252367	0.0129982	0	0	0.0376768	0.0712483	0.285407	0	0.300637	0.155285	0.138793	0.0958088	0.110308	0.0628104	0.0820289	0.103557	0.129115	0.174883	0.223226	0.0255001	0.0386481	0.0232298	0.154881	0.126386	0	0	0	0	0	0	0	0	0	0	0	0	0	0	0	0	0	0	0
Tetradecyl acetate	256	0.204627	0.887851	0.812152	0.695957	0	0.0829801	0	0	0	0.28281	0.27215	0.269677	0.108301	0.131639	0.191303	0.156358	0.0937075	0.149214	0	0	0	0.0701884	0	0	0.0271106	0.0363067	0.0331501	0.0181655	0.0433337	0	0	0	0	0	0	0	0	0	0	0	0	0	0	0	0	0	0	0
Unknown Vestalis 1	?	0	0.75886	0.582473	0.610404	0.285107	0.0897006	0.0611583	0.117725	0.348209	0.116146	0	0	0	0	0	0	0	0	0.0967419	0.0749192	0.168462	0.204978	0.265023	0.257961	0.0386362	0.0504382	0.0384914	0.0980701	0.172288	0	0	0	0	0	0	0	0	0	0	0	0	0	0	0	0	0	0	0
Hexadecanoic acid	256	0	0.745119	0.440104	0.452595	0	0.372265	0	0	0	1.50094	0.131399	0	0	0	0	0	0	0	0	0	0	0	0	0	0	0	0	0	0	0	0	0	0	0	0	0	0	0	0	0	0	0	0	0	0	0	0	0
Octadec-11-enal	266	1.02097	0.369694	0.2702	0.328161	2.09684	1.0393	1.77297	2.10847	1.00665	1.54667	1.82335	1.49717	1.4387	1.26822	0.881552	0.701125	0.65002	0.858423	1.19069	1.00024	0.969729	0.520648	1.26843	0.845781	0.644525	0.432407	0.595186	0.527604	0.643147	0.155407	0.338982	0.101399	0.110596	0.161509	0.125841	0.0505936	0.0946482	0.0324353	0.0672285	0	1.50839	0.0972081	0.154928	0.227971	0	0.186828	0	0
Octadec-13-enal	266	0.189704	0	0	0	0	0	0	0	0	0	0.244081	0.185794	0.228918	0.221253	0.202577	0.198591	0.148599	0.192586	0.368307	0.252467	0.175016	0.159383	0.218331	0.174173	0.208237	0.177781	0.191676	0.241236	0.261763	0	0	0	0	0	0	0	0	0	0	0	0	0	0	0	0	0	0	0
Octadecadien-1-ol	266	0.30361	0	0	0	0.265758	0.374578	0	0	0	0.166917	0.241378	0.60757	0.0363001	0.337432	0.653324	0.259794	0.326607	0.312213	0.493155	0.326299	0.204361	0.0766793	0.114467	0.13983	0.0416922	0.0383493	0.0213737	0.120545	0.13552	0	0	0	0	0	0	0	0	0	0	0	0	0	0	0	0	0	0	0
Nonadecane	268	0.026217	0.111682	0.0552284	0.0649835	0.0158037	0.0116304	0	0.0274072	0.0408933	0.0225493	0.0227256	0.0510809	0.0104072	0.0744479	0.018271	0.0100988	0	0.0099131	0.013982	0.022073	0.0166731	0	0.0102401	0.00745603	0.00637582	0.00697342	0.0089703	0	0	0	0	0	0	0	0	0	0	0	0	0	0	0	0	0	0	0	0	0
Octadecanal	268	0.119896	2.64544	2.53842	3.01285	0.156607	0.107658	0.231871	0.385942	0.374571	0.235988	0.160864	0.111803	0.288313	0.12634	0.129995	0.095438	0.064187	0.0811163	0.306465	0.236148	0.206046	0.0973865	0.284523	0.168845	0.195281	0.139191	0.278901	0.129396	0.143632	0	0	0	0	0	0	0	0	0	0	0	0	0	0	0	0	0	0	0
Octadec-11-en-1-ol	268	0.960326	0	0	0	0.820148	0.87293	0.0565828	0.26427	0.299166	0.672019	0.808602	1.41402	0.0994433	1.09738	1.22659	0.614759	0.722831	0.65313	1.09661	0.674639	0.696888	0.206367	0.618029	0.472175	0.243273	0.206832	0.136944	0.622917	0.861494	0	0	0	0	0	0	0	0	0	0	0	0	0	0	0	0	0	0	0
Hexadec-9-enyl acetate	282	3.9578	1.54056	1.65539	1.92696	5.01047	3.1733	2.94085	2.84801	0.870926	4.70991	5.2106	4.2612	3.56265	5.17303	5.38949	2.96856	2.79103	3.35539	5.36768	2.8078	3.17441	2.6732	3.02228	3.35205	2.32659	3.17342	2.44611	2.98412	3.72189	0.912002	0.47864	0	0	0	0	1.03117	0.395693	0.0850069	0.206999	1.47963	0.804621	0.0861767	0.522662	0.74853	0	0.688017	0	0
Hexadec-11-enyl acetate	282	0.42909	0.462825	0.572576	0.66963	0.617434	0.278977	0.823394	0.477889	0.389668	0	0.860209	0.762681	0.914175	0.693632	0.887738	0.490768	0.44456	0.504335	0.640732	0.345654	0.425434	0.350922	0.402724	0.363419	0.245875	0.283057	0.231345	0.43352	0.474323	1.18948	0.111787	0.437228	0.199261	0.0644923	0.168223	0.0563074	0.166526	0	0	0.192669	0	0	1.8335	0.0390632	0	0	0	0
Geranylgeraniol	290	0	0	0	0	0	0	0.335662	0.297011	0	0	0	0.256437	0.121293	0	0	0	0	0	0	0	0	0	0	0	0	0	0	0	0	0.311538	0.312678	0.0519483	0	0.475284	0	0	0.0863816	0.0612026	0.52122	0.128511	0.105627	0.180582	0.167537	0.0786948	0.0982089	0.0575501	0	0
Geranylcitronellol	292	23.5906	21.9859	38.5102	29.1697	33.7805	36.3725	35.3341	45.9615	47.0086	30.8504	24.2217	26.6554	18.9885	31.6126	21.6163	15.5316	22.1874	19.5493	24.5957	31.052	23.45	8.46767	19.6217	17.4114	14.1947	13.2837	10.582	9.67627	9.14927	0.824508	19.2721	6.64896	18.7649	24.3025	21.7869	23.4703	0.351047	32.5351	24.6168	16.6274	0.259614	19.4082	30.9747	1.33052	0.371073	2.63275	0	36.8634
Unknown Vestalis 2	?	0	0	0	0	0	7.89884	0	0	0	19.8237	3.11048	0	0	0	2.81519	0	0	0	3.79543	3.1717	2.95342	3.93738	2.50582	3.76535	3.17404	2.77285	2.16887	4.48548	5.51568	0	0	0	0	0	0	0	0	0	0	0	0	0	0	0	0	0	0	0
Icosadienal	292	16.9565	12.3748	12.4711	14.6861	15.9312	12.1575	12.2011	12.7831	10.6424	10.2515	16.6792	16.8099	16.4088	15.8431	18.6099	20.4617	20.6144	19.3171	18.8725	17.5291	13.8653	21.9866	15.3968	3.66485	6.22033	6.64831	8.78344	6.14425	4.85918	11.3034	8.76364	7.9894	4.13264	10.7674	0	0.561876	0	0.858822	9.73471	17.2234	5.08303	12.1414	11.2454	9.03916	0	15.8681	10.4942	0
Icosatrienol	292	0	0	0	0	2.1948	1.86398	0	0.363095	0	0.391705	2.0205	0	0	0	0.939207	0.723609	2.47383	0.758518	1.69128	1.45377	0	1.20385	1.16486	0.776584	1.83776	1.89723	1.18276	0.864344	0.931368	0	0	0	0	0	0	0	0	0	0	0	0	0	0	0	0	0	0	0
Icos-15-enal	294	2.76516	0	0	0	1.63655	2.07204	2.29503	0.468558	0.272386	0.397787	1.78708	1.88345	2.1883	1.92782	2.46812	3.55128	2.5107	3.53587	4.31335	3.57668	1.57321	4.56559	3.83054	0.383594	0.816924	0.496084	0.808981	0	0	0	0	0	0	0	0	0	0	0	0	0	0	0	0	0	0	0	0	0
Icosadienol	294	3.4601	0	0	0	0	0	0	0	0	0	0	4.30664	0	1.78617	2.60988	1.82595	0	1.69604	0	0	0	0	0	1.38254	0	0	0	1.57295	1.70413	0	0	0	0	0	0	0	0	0	0	0	0	0	0	0	0	0	0	0
Henicosane	296	0.496076	6.51283	5.40564	7.18407	0.532264	0.496699	0.350969	0.999907	1.25025	0.764186	0.459231	0.240189	0.453617	1.04231	0.379928	0.15864	0.0730946	0.100704	0.627461	0.584461	0.383863	0.133741	0.509458	0.326754	0.16672	0.195315	0.26544	0.125551	0.0912844	0.322965	0.792116	0.269137	0.498499	0.464097	0.283493	0.423995	0.245014	0.436544	0.278027	0.337991	0.230544	0.300949	0.523606	0.266122	0	1.76119	0	0
Icos-15-en-1-ol	296	8.32951	1.70638	1.27593	1.8131	5.16935	5.23455	1.42034	1.1536	0.289531	1.55309	5.47319	11.9397	0.73402	4.45696	7.86831	7.63736	6.29253	8.76373	1.13048	1.19887	2.05024	4.04082	4.48054	6.38998	5.92476	5.98756	5.28312	5.00338	2.4376	0.924162	20.8825	0	0	0	0	0.649939	0	0.101779	0.262897	0.806837	0.404109	0	0.766271	1.01649	0	0.663177	0	0
Octadecadienyl acetate	308	2.57178	0	0	0	2.69071	3.2904	4.81363	0	0	4.5169	3.15915	1.65669	1.92981	3.23086	3.58881	4.15758	4.44765	3.47645	0	0	1.46475	0	1.4984	15.244	21.142	24.4925	22.8067	22.5357	22.3219	0	0	0	0	0	0	0	0	0	0	0	0	0	0	0	0	0	0	0
Octadec-13-enyl acetate	310	0	0	0	0	1.81281	0	0	0	0	0	0	0	0	0	0	0	0	0	0	0	0	0	0	0	0	0	0	0	0	0	0	0	0	0	0	0	0	0	0	0	0	0	0	0	0	0	0	0
Docosenal	322	0	0	0	0	0.0614484	0.0905569	0	0.038142	0.0311023	0.0519592	0	0	0	0	0.162922	0	0.0608389	0.193616	0.198008	0.241622	0	0	5.65021e-08	0	0.14339	0.278197	0.133744	0.156517	0.126454	0	0	0	0	0	0	0	0	0	0	0	0	0	0	0	0	0	0	0
Tricosane	324	0	0	0	0	0	0	0	0	0	0	0	0	1.56319	0	0	0	0	0	7.56161	5.52715	3.03486	2.52867	2.34024	1.6053	0	0	0	1.47793	6.20222	6.57862	3.71179	14.2902	20.9329	22.0335	14.1869	15.9325	14.6155	21.8656	24.4237	7.9583	5.12832	9.52775	18.7408	7.77675	4.52412	9.71932	5.04589	4.52133
Unknown Vestalis 3	?	2.44827	14.0229	8.53705	9.67369	1.8044	1.8894	4.17084	3.16208	4.51577	2.65406	2.18197	2.28011	3.21464	2.75939	1.86868	1.71356	1.44552	1.99498	4.2107	3.28454	2.67668	1.71836	3.81822	2.52043	2.49414	2.28373	2.88229	2.28521	1.97731	0	0	0	0	0	0	0	0	0	0	0	0	0	0	0	0	0	0	0
Geranylcitronellyl acetate	334	22.7124	2.65752	3.12383	4.20434	18.8403	17.9936	25.3664	19.0157	14.9458	13.8303	23.8143	18.2054	29.4174	19.6397	20.4588	30.9572	27.7324	27.5839	17.3281	20.4591	35.2478	36.6508	30.7401	32.6394	34.2088	28.8233	33.205	31.3858	27.9444	39.4638	22.5852	36.1081	19.8178	24.2312	28.9979	33.6303	14.5524	20.8522	18.4798	34.2166	35.7094	16.7393	20.0305	47.9886	12.6888	32.2344	21.8861	32.2052
Icos-11,15-adienyl acetate	336	1.68632	0	0	0	0.522399	0.518456	0.310927	0.135206	0	0.158789	1.19511	1.05608	1.01393	0.620505	1.46442	2.73429	1.93363	1.79733	0.708613	0.66755	1.57186	5.74867	2.66753	3.4543	1.14871	2.69355	2.5643	4.15045	4.71005	18.4542	2.50748	10.0304	14.6878	1.80499	6.05268	9.91063	0.40675	4.6015	2.0269	2.04458	16.3	3.71453	1.74065	18.184	0	2.34037	0	0
Icos-15-enyl acetate	338	0.674371	0.11927	0.0819263	0.0812384	0.334974	0.141638	0.122425	0.0626074	0	0.0564839	0.379694	0.55152	0.362133	0.32781	0.480791	1.12793	0.555274	0.675485	0.342186	0.279567	0.569072	1.61168	0.963235	1.14583	0.487523	0.794043	1.11295	0.841062	1.13044	6.8913	7.27708	2.1292	2.58036	6.13253	1.24854	2.35818	1.57569	4.82876	2.952	2.59157	1.60232	3.00595	2.19724	3.53844	0	1.8614	0	1.19472
Pentacos-9-ene	350	0.0116484	0.824816	0.538221	0.686162	0.0472292	0.0124568	0.0111483	0.0471441	0.16028	0.0367711	0.0249168	0.0136061	0.0653762	0.0341502	0.00870779	0.00757192	0.0105192	0.00797546	0.0334131	0.0438902	0.037193	0	0.0243419	0.00715132	0.00498519	0.00899331	0.00563541	0.00552244	0.00631939	0	0	0	0	0	0	0	0	0	0	0	0	0	0	0	0	0	0	0
Pentacos-7-ene	350	0.0188148	0	0	0	0.0178393	0.00693186	0.0298594	0.0250699	0.049602	0.0192646	0.022724	0.0268321	0.0368631	0.0127571	0.00780077	0.0156269	0.0120009	0.0125725	0.00860141	0.0128721	0.00912697	0.0279144	0.0154691	0.0135957	0.0104426	0.0108678	0.00886958	0.00755301	0.00712305	0	0	0	0	0	0	0	0	0.0832716	0.0563896	0.0236304	0.0593786	0	0.0227522	0.22175	0	0	0.188039	0.0828439
Pentacosane	352	1.27075	5.97401	3.39961	3.44211	0.859018	0.570131	1.05119	1.3051	2.3402	0.848268	1.11471	1.16909	1.56837	0.900514	1.0415	0.970567	1.29328	1.08069	1.59202	1.12052	1.04671	0.786261	1.03563	0.81958	1.34865	1.35139	1.42247	1.18093	1.34727	2.8389	1.52549	2.65638	5.16342	3.34953	6.05362	2.54183	4.9932	4.60291	4.51231	4.24187	2.80172	4.4612	2.67933	3.06634	4.23933	3.63143	2.89076	2.265
Docosadienyl acetate	364	0.0598772	0.122956	0.0644802	0.0880409	0.0207511	0.0151379	0.0233223	0.0378546	0.0669394	0.0332104	0.0265361	0.0199929	0.0487329	0.0489181	0.0230754	0.017535	0.0111496	0.011027	0.00976186	0.0172143	0.0114084	0.0372187	0.0136256	0.0134071	0.00625271	0.0154451	0.0083568	0.0221223	0.0270044	0	0	0	0	0	0	0	0	0	0	0	0	0	0	0	0	0	0	0
Hexacosene	364	0	0	0	0	0	0	0	0	0	0	0	0	0	0	0	0	0	0	0	0	0	0	0	0	0	0	0	0	0	0	0	0	0	0	0.0430122	0	0	0	0	0	0.0198592	0	0	0	0	0	0	0
Hexacosane	366	0.0749609	0.165511	0.0890415	0.0965887	0.0462666	0.0240468	0.0414317	0.0642062	0.101935	0.0482518	0.0628053	0.0492184	0.0804367	0.0451636	0.0635119	0.0424304	0.0486752	0.0401177	0.0474283	0.0342087	0.0292749	0.0246904	0.0336587	0.0366889	0.0535273	0.0569342	0.0541394	0.0419811	0.0450658	0.547005	0.0797781	1.27133	0.238663	0.142943	1.80207	0.151194	0.214589	0.152277	0.774933	0.377765	0.164451	0.164876	0.249938	0.354395	0.415512	0.120141	0.327079	0.524274
Heptacos-9-ene	378	0.054649	0	0	0	0.109676	0.0347004	0.0676682	0.146701	0.407179	0.0839508	0.0532439	0.0460344	0.139192	0.102114	0.0714794	0.0356142	0.0450148	0.0375361	0.0335841	0.0580925	0.0590978	0.0177769	0.052243	0.0331115	0.0165006	0.0296126	0.0212616	0.0308099	0.0299933	0	0	0	0	0	0	0	0	0	0	0	0	0	0	0	0	0	0	0
Heptacos-7-ene	378	0.314844	1.92558	1.26262	1.46757	0.223928	0.106503	0.186941	0.233988	0.322581	0.139974	0.283757	1.10154	0.390221	0.289435	0.152387	0.19824	0.175767	0.13672	0.105161	0.125761	0.110727	0.112785	0.191333	0.172555	0.133022	0.16192	0.106943	0.122294	0.105599	0.24482	0.195814	0.0491565	0.915677	0.386527	1.69935	0.444961	0.553012	0.405631	0.893828	0.49743	0.296792	0.514265	0.491092	0.221378	0.106509	0.393107	0.00121822	0.120044
Heptacosane	380	1.55528	5.03738	2.93427	3.07965	1.28327	0.588423	1.79893	1.80099	2.5913	1.02682	1.36162	0.110329	2.52507	1.33021	1.25317	0.949176	1.1544	0.965986	1.54842	1.27357	1.3179	0.940568	1.20529	0.961333	1.25646	1.4803	1.27679	1.28035	1.30765	3.13815	1.67101	1.46445	4.92244	2.81674	5.60905	1.82018	4.62088	1.80226	2.13643	4.37517	0.796344	2.46928	3.32858	1.84635	2.71161	2.469	2.4134	2.60172
Octacosene	392	0.020604	0.126855	0.0796727	0.0968785	0.0106809	0.00865691	0.0136846	0.0169448	0.0178928	0.0154101	0.0183087	0.00438728	0.0243174	0.0114488	0.0134798	0.00854572	0.00995369	0.00673239	0.00274023	0.0104436	0.0117673	0.00550376	0.00805336	0.0098994	0.00366313	0.00715251	0.00353803	0.00286352	0.0030425	0.154283	0.106101	0.0932092	0.195797	0.055337	0.140758	0.058883	0.224377	0.131082	0.0729387	0.107648	0	0.129668	0.135645	0.0825118	0	0	0	0
Octacosane	394	0.0478802	0.149343	0.0613386	0.0888062	0.0350171	0.0186851	0.030167	0.0448333	0.0693937	0.0273785	0.0399459	0.0329264	0.0690731	0.0311001	0.0405554	0.0570918	0.0530553	0.0485076	0.0348082	0.0391246	0.0227027	0.0261494	0.0192412	0.02247	0.064201	0.0681589	0.0575684	0.0623219	0.0474123	0.244517	0.0411059	0.0277763	0.156168	0.044004	0.0569522	0.0450806	0.591674	0.106624	0.184501	0.121419	1.32319	0.208791	0.0211394	0.274107	2.22727	0.343935	0	0
Nonacos-9-ene	406	0.200505	0	0	0	0.19053	0.10593	0.133292	0.200023	0.637849	0.18063	0.158846	0.0915069	0.389676	0.201312	0.237262	0.0739379	0.0967435	0.0975874	0.0855261	0.133386	0.119171	0.0466362	0.0671225	0.0545922	0.0418589	0.0923271	0.0350113	0.073087	0.0731083	0	0	0	0	0	0	0	0	0	0	0	0	0	0	0	0	0	0	0
Nonacos-7-ene	406	0.638546	2.77713	2.24444	2.31853	0.378777	0.255716	0.346518	0.453203	0.678979	0.309961	0.424954	0.387857	0.797715	0.622024	0.356322	0.315032	0.267232	0.244387	0.183351	0.288855	0.215289	0.172045	0.203881	0.203052	0.236417	0.335735	0.191292	0.234393	0.191427	0.494769	0.220555	0.264671	0.872319	0.46168	0.950629	0.977589	2.49367	1.58519	1.51168	0.79462	5.91992	0.805459	0.442518	0.225228	0	0.160965	0	0
Nonacosane	408	0.770447	5.33555	2.73678	3.37382	0.982458	0.481229	1.3945	1.25884	2.11149	0.810022	0.79157	0.468182	1.78784	0.840445	0.709279	0.46369	0.53888	0.451045	0.521065	0.566684	0.372784	0.326752	0.32886	0.276818	0.538526	0.64855	0.593492	0.582308	0.66091	0.956656	1.54496	0.403841	1.33019	0.539123	1.39787	0.424743	14.7494	0.545784	0.506077	1.11728	0.402122	5.4743	1.5345	0.265317	0.267344	0.365027	0	0.546009
13-Methylnonacosane	422	0.171518	1.42069	0.563312	0.747852	0.180364	0.108013	0.285188	0.158804	0.33986	0.130891	0.124005	0.0724227	0.285385	0.165032	0.0803565	0.0525877	0.0327437	0.0359344	0.0267664	0.0519057	0.0250265	0.0143755	0.0293948	0.029298	0.0158799	0.0267024	0.00546005	0.0208976	0.0177031	0	0.0370894	0	0	0	0	0	0	0	0	0	0	0	0	0	0	0	0	0
Unknown Vestalis 4	?	0.0241076	0.334227	0.117539	0.167411	0.0123546	0.00625907	0	0.00904132	0.0394411	0.0122306	0.0088296	0.00544956	0.0147654	0.0148227	0.00863926	0.00205605	0.00245971	0.00196279	0.00216631	0.00294824	0.00169774	0.00185183	0.00260832	0.00225992	0.00358241	0.00442415	0.00285502	0.00394021	0.00305532	0.0191473	0.1474	0	0	0	0.0417298	0.033127	5.19472	0.173838	0.041206	0.0737146	3.235	0	0.124795	0.0647152	6.45626	2.5592	0	0
Hentriacontene	434	0.208046	1.25837	0.909846	0.758013	0.086181	0.063172	0.0824493	0.174341	0.374059	0.109364	0.0915143	0.0553481	0.326404	0.118766	0.156018	0.0932429	0.0665115	0.18288	0.0825257	0.180671	0.102294	0.064425	0.0494932	0.0499811	0.0525652	0.102766	0.0589107	0.0727757	0.066056	0	0	0	0	0	0	0	0	0	0	0	0	0	0	0	0	0	0	0
Hentriacontane	436	0.0476272	0.647063	0.246214	0.324254	0.0322407	0.0160929	0.0509633	0.047838	0.117771	0.0298771	0.0245443	0.0137564	0.23009	0.0294332	0.0362387	0.0193866	0.0139976	0.0143493	0.0112882	0.0137848	0.0136651	0.00430396	0.00552979	0.00391156	0.00956383	0.0221647	0.0152759	0.0177371	0.0193574	0	0	0	0	0	0	0	0	0	0	0	0	0	0	0	0	0	0	0
Tetradecyl hexadecanoate	452	0.00601496	0.249656	0.134019	0.21917	1.33002e-20	0.005086	6.39874e-21	0.00962329	0.0208401	0.00820313	4.3338e-23	3.80701e-44	0.00798882	0.0123553	6.75531e-24	3.30563e-45	7.59406e-67	9.27821e-88	1.2137e-107	0.00564384	6.46409e-23	4.29757e-44	1.93433e-64	1.23595e-85	1.43005e-107	1.02913e-129	1.26623e-151	1.3549e-173	8.12077e-196	0.0169604	0.389546	3.59268	0	0	0.0338136	0.020918	0.116807	0.169091	0.107037	0.0374043	0.153546	1.93923	0	0	0	0	0	0
Unknown Vestalis 5	?	0.319396	1.50308	1.65331	1.97322	0.190576	0.352306	0	0.558283	1.52715	0.389801	0.331745	0.175736	6.54074	0.502239	0.197445	0.0667236	0.118806	0.250681	0.272082	0.497675	0.43338	0.0812925	0.252658	0.201732	0.0511316	0.0800037	0.120808	0.0407226	0.126821	0.0247747	0.502509	4.06322	3.78924	0.847928	6.85034	3.38795	0.042288	0.454156	1.53252	0.0302095	0.0601827	0.0142453	0.00266588	0.0199192	0	0	2.76805	18.4888
Tetradecyl octadecenoate	478	0.375969	1.9903	1.51932	1.75793	0.180669	0.186846	0.833306	0.544632	1.1905	0.315605	0.092559	0.11841	0.207546	0.472074	0.157398	0.142958	0.0741614	0.271162	0.133019	0.208278	0.322258	0.0982574	0.168275	0.14242	0.0449351	0.111347	0.0825557	0.0718558	0.0863436	0.513479	0.406049	0	0	0	0.0933029	0.318417	0.175598	0.0246094	1.62684	1.13362	0.821262	0.172917	0.111578	1.66746	0.463206	0.0811104	6.47112	0.586637
Geranylcitronellyl tetradecenoate	500	0.268825	1.62219	1.93521	2.21106	0.243003	0.195785	0.650762	0.833088	1.86747	0.371717	0.263914	0.260852	0.828124	0.502995	0.150185	0.123451	0.137008	0.205701	0.143081	0.313102	0.434161	0.0809195	0.218451	0.128872	0.0867264	0.0959359	0.0844867	0.0597204	0.0710203	0.673539	0.190744	0	0.161383	0.738195	1.22522	1.05734	0.613624	0.672702	0.714735	1.07742	0.148792	1.66645	0.29707	0.0876946	0	0.961961	15.9819	0
Octadecadienyl hexadecenoate	502	0.0754195	0	0	0	0	0	0	0	0	0	0.0344371	0.0913731	0.06806	0.215555	0.0192909	0.0329682	0.0324717	0.0440797	0.0210263	0.0194451	0.0435673	0.0120891	0.0149488	0.0106769	0.0124052	0.0151279	0.0105991	0.00645284	0.0142113	0.0893896	4.65088	0	0	0	0.726797	0.0177616	23.7362	1.04451	0.0176398	0.0388958	5.66313	6.68491	0	0.745102	0	0	0	0
Icosenyl tetradecanoate	504	0.111057	0.3788	0.393483	0.440885	0.0872275	0.027598	0.236702	0.160532	0.207331	0.0733813	0.0620089	0.116726	0.0563441	0.178224	0.0244572	0.0274282	0.0282232	0.0332806	0.0343847	0.0338429	0.0554737	0.0127778	0.0478915	0.0167759	0.00958027	0.0111288	0.011937	0.00852025	0.0239139	0.813304	0.402277	0	0	0	0	0.119587	0	0.391631	0.0391509	1.18973	3.93694	3.56198	0.487336	0.429193	65.4307	12.2766	31.5323	0
Geranylcitronellyl hexadecenoate	528	0.0870467	0.21724	0.515251	0.361721	0.0452455	0.0332461	0.0435772	0.350019	0.566997	0.0859891	0.0584061	0.10295	0.0867618	0.203433	0.024408	0.0286391	0.0428877	0.0568962	0.0207012	0.0411891	0.0883701	0.0103043	0.0362484	0.0289344	0.0213176	0.0197229	0.0223139	0.00947484	0.0206712	1.89891	0.854663	8.01248	0.419875	0.144664	0.3323	0.466203	8.97302	1.33428	1.67037	1.15463	3.04797	6.53042	0.868391	0.194216	0	8.62434	0	0
Geranylcitronelly hexadecanoate	530	0.124179	0.513363	1.8364	1.21616	0.0887192	0.0418342	0.0671713	0.848756	1.90715	0.225364	0.181337	0.162963	0.342082	0.444273	0.0477005	0.0317404	0.0500785	0.0719081	0.0345344	0.0584683	0.135244	0.0124239	0.0594283	0.0456808	0.0149205	0.0134995	0.0144672	0.006048	0.0138485	0	0	0	0	#DIV/0!	0	0	0	0	0	0	0	0	0	0	0	0	0	0
Total Relative Area		100	100	100	100	100	100	100	100	100	100	100	100	100	100	100	100	100	100	100	100	100	100	100	100	100	100	100	100	100	100	100	100	100	#DIV/0!	100	100	100	100	100	100	100	100	100	100	100	100	100	100
			27.42	29380.7
			27.82	34198
			28.5	62771.1
			30.05	41811.8
			31.35	8348.78
			31.87	14622.2
