# Supplementary material for: Patterns of Genetic and Reproductive Traits Differentiation in Mainland vs. Corsican Populations of Bumblebees
Source: PLoS One. 2013 Jun 6;8(6):e65642. doi: 10.1371/journal.pone.0065642 (PMC3675023; doi:10.1371/journal.pone.0065642)
Supplement: Table S6 — List of the identified compounds in Corsican, Sardinian and continental B. terrestris Molecular weight (MW (m/z)). Median (Med (%)). First and fourth quartiles (Q1 (%) and Q2 (%)). Minimum and maximum (Min (%) and Max (%)) of the 105 identified compounds. Unknown Terrestris x are undetermined compounds. (XLS) [file pone.0065642.s006.xls]

## Sheet: Feuil1
Compounds	MW	B. terrestris dalmatinus					B. terrestris terrestris & lusitanicus					B. terrestris xanthopus					B. terrestris sassaricus
		MIN	Q1	MED	Q3	MAX	MIN	Q1	MED	Q3	MAX	MIN	Q1	MED	Q3	MAX	MIN	Q1	MED	Q3	MAX
Unknown Terrestris 1	?	0.00	0.00	0.00	0.00	0.00	0.07	0.10	0.14	0.17	0.82	0.00	0.00	0.00	0.00	0.00	0.00	0.00	0.00	0.00	0.00
Tetradecane	196	0.00	0.00	0.00	0.00	0.00	0.00	0.00	0.00	0.00	0.00	0.00	0.05	0.28	0.68	2.40	0.00	0.00	0.00	0.00	0.03
Dodecanoic acid	200	0.00	0.00	0.00	0.00	0.00	0.00	0.71	1.50	3.52	8.30	0.00	0.00	0.00	0.00	0.00	0.00	0.00	0.00	0.00	0.00
Tetradecanal	212	0.54	1.02	1.26	1.50	2.05	0.00	0.00	0.00	2.73	3.88	0.00	0.00	0.00	0.00	0.00	0.00	0.00	0.00	0.00	0.00
Methyl dodecanoate	214	0.00	0.00	0.00	0.00	0.00	0.05	0.12	0.21	0.31	0.52	0.00	0.00	0.00	0.00	0.00	0.00	0.00	0.00	0.00	0.00
Farnesol	222	0.00	0.00	0.00	0.00	0.00	0.00	0.00	1.81	2.34	3.12	0.52	3.54	5.55	8.42	14.38	0.43	1.02	1.12	1.29	2.72
2.3-Dihydrofarnesal	222	1.28	1.34	1.62	2.16	2.94	0.00	0.00	0.00	0.00	0.00	0.00	0.00	0.00	0.00	0.00	0.00	0.00	0.00	0.00	0.00
2.3-Dihydrofarnesol	224	30.24	38.07	63.00	82.71	88.65	2.98	4.04	7.89	10.15	15.30	0.00	2.56	4.05	6.36	19.01	4.39	19.62	20.71	22.64	26.47
2.3-Dihydrofarnesyl acetate	226	0.00	0.04	0.07	0.11	0.17	0.00	0.00	0.00	0.00	0.00	0.00	0.00	0.00	0.00	0.00	0.00	0.14	0.15	0.22	0.34
Tetradecenoic acid	226	0.00	0.00	0.00	0.00	0.00	0.03	0.43	0.62	1.16	3.11	0.00	0.00	0.00	0.22	1.36	0.01	0.16	0.22	0.36	0.98
Ethyl dodecanoate	228	0.05	0.20	0.24	0.35	0.73	1.54	4.32	6.03	7.91	11.69	0.00	0.00	0.00	0.00	0.00	0.00	0.00	0.00	0.00	0.00
Dodecyl acetate	228	0.08	0.12	0.13	0.16	0.18	0.00	0.00	0.00	0.00	0.00	0.00	0.00	0.00	0.00	0.00	0.00	0.00	0.00	0.00	0.00
Tetradecanoic acid	228	0.00	0.17	0.20	0.25	0.60	0.06	0.29	0.47	1.02	4.78	0.00	0.00	0.00	0.00	0.00	0.00	0.00	0.00	0.00	0.00
Hexadecenal	238	0.06	0.15	0.19	0.26	0.54	0.00	0.00	0.00	0.00	0.00	0.27	0.91	1.45	4.46	9.36	0.00	0.00	0.00	0.00	0.04
Hexadecatrienol	238	0.00	0.00	0.07	0.13	0.30	0.00	0.00	0.00	0.00	0.00	0.00	0.00	0.00	0.00	0.00	0.00	0.00	0.00	0.00	0.00
7-Methylhexadecane	240	0.00	0.00	0.00	0.00	0.00	0.06	0.09	0.14	0.21	0.31	0.00	0.00	0.00	0.00	0.00	0.00	0.00	0.00	0.00	0.00
Unknown Terrestris 2	?	0.00	0.00	0.00	0.00	0.00	0.00	0.00	0.00	0.00	0.00	0.00	0.00	0.00	0.00	0.00	0.00	0.19	0.26	0.36	0.73
Unknown Terrestris 3	?	0.00	0.00	0.00	0.00	0.00	0.00	0.00	0.00	0.00	0.10	0.00	0.00	0.00	0.00	0.00	0.00	0.00	0.00	0.00	0.00
Hexadecanal	240	0.06	0.10	0.14	0.15	0.22	0.00	0.27	0.38	0.48	0.74	0.26	2.20	2.67	3.91	7.24	0.13	0.15	0.22	0.26	1.30
Hexadecenol	240	0.00	0.00	0.00	0.07	0.34	0.00	0.00	0.00	0.00	0.00	0.00	0.00	0.00	0.00	0.00	0.00	0.19	0.26	0.33	0.54
Heptadecane	240	0.00	0.00	0.00	0.00	0.00	0.00	0.00	0.00	0.00	0.11	0.00	0.00	0.00	0.00	0.00	0.00	0.00	0.00	0.00	0.00
Isopropyl dodecanoate	242	0.00	0.00	0.00	0.00	0.00	0.00	0.00	0.09	0.15	0.30	0.00	0.00	0.00	0.00	0.00	0.00	0.00	0.00	0.00	0.00
Hexadecanol	242	2.03	2.97	3.17	3.43	4.72	0.08	0.31	0.64	1.18	1.87	0.00	0.00	0.73	2.58	11.90	4.38	5.77	7.75	8.04	9.09
Ethyl tetradec-9-enoate	254	0.00	0.00	0.00	0.00	0.00	0.12	0.30	0.42	0.79	1.91	0.00	0.00	0.00	0.00	0.00	0.00	0.00	0.00	0.00	0.00
Hexadecenoic acid (isomer I)	254	0.00	0.00	0.00	0.00	0.00	0.00	0.26	0.38	0.59	1.61	0.00	0.00	0.00	0.43	5.17	0.06	0.73	0.99	1.15	1.69
Hexadecenoic acid (isomer II)	254	0.00	0.00	0.00	0.00	0.00	0.00	0.27	0.39	0.60	3.26	0.00	0.00	0.00	0.00	0.00	0.00	0.18	0.23	0.53	0.79
Ethyl tetradecanoate	256	0.00	0.00	0.00	0.00	0.00	0.23	0.50	0.59	0.72	0.99	0.00	0.00	0.00	0.00	0.00	0.00	0.00	0.00	0.00	0.00
Hexadecanoic acid	256	0.00	0.00	0.00	0.00	0.09	0.00	0.00	0.00	0.20	1.20	0.00	0.00	0.00	0.00	0.00	0.00	0.09	0.14	0.16	0.28
Octadecadienal	264	0.00	0.00	0.06	0.07	0.09	0.00	0.00	0.00	0.00	0.00	0.00	0.26	0.61	1.04	2.55	0.11	0.23	0.31	0.37	0.60
9,12,15-Octadecatrien-1-ol	264	0.00	0.00	0.00	0.00	0.00	0.00	0.00	0.00	0.00	0.00	0.00	0.00	0.00	0.00	2.22	3.13	3.76	4.29	4.79	7.57
Dihydrofarnesyl acetate	266	0.00	0.00	0.00	0.00	0.00	0.31	1.43	2.23	4.34	10.52	0.00	0.00	0.00	0.00	0.00	0.00	0.00	0.00	0.00	0.00
Octadec-13-enal	266	0.00	0.00	0.00	0.00	0.00	0.00	0.00	0.00	0.00	0.00	0.00	0.14	0.55	0.87	4.64	0.00	0.00	0.00	0.00	0.13
9,12-Octadecadienol	266	0.41	1.81	2.66	3.56	6.39	0.00	0.00	0.00	0.00	0.00	0.00	0.00	0.00	0.00	2.44	2.31	10.08	11.18	11.38	15.31
Pentyl dodecanoate	270	0.00	0.00	0.00	0.00	0.08	0.00	0.00	0.00	0.00	0.00	0.00	0.00	0.00	0.00	0.00	0.00	0.00	0.00	0.00	0.00
Hexadecenyl acetate	276	0.00	0.07	0.15	0.21	0.23	0.00	0.00	0.00	0.00	0.00	0.00	0.00	0.00	0.00	0.00	0.00	0.00	0.00	0.00	0.00
Unknown Terrestris 4	?	0.00	0.00	0.01	0.05	0.07	0.00	0.00	0.00	0.00	0.00	0.00	0.00	0.00	0.00	0.00	0.00	0.00	0.00	0.00	0.00
Octadecatrienal	278	0.00	0.06	0.08	0.12	0.22	0.00	0.00	0.20	0.35	0.79	0.83	1.71	2.26	4.04	9.45	0.25	0.31	0.59	0.67	1.76
Nonadecadienal	278	0.00	0.06	0.07	0.15	0.19	0.00	0.00	0.00	0.00	0.00	0.00	0.00	0.00	0.00	0.00	0.00	0.00	0.00	0.00	0.00
Icosane	282	0.00	0.00	0.00	0.00	0.07	0.00	0.00	0.00	1.31	1.75	0.00	0.00	0.00	0.00	0.00	0.00	0.00	0.00	0.00	0.00
Hexadecyl acetate	284	0.00	0.00	0.00	0.00	0.00	0.00	0.00	0.19	1.04	1.40	0.00	0.00	0.00	0.00	0.00	0.00	0.00	0.00	0.00	0.00
Geranylgeraniol	290	0.00	0.00	0.00	0.00	0.00	0.00	0.00	0.00	0.00	0.00	0.77	4.95	6.33	7.63	12.29	0.00	0.00	0.00	0.00	6.10
Geranylcitronellal	290	0.35	1.19	1.86	3.09	4.34	0.09	1.70	2.01	2.79	7.36	0.00	0.00	0.00	0.00	0.00	0.00	0.72	1.33	1.62	1.71
Geranylcitronellol	292	0.69	2.20	7.08	11.78	12.07	4.02	8.70	9.84	11.30	28.89	0.18	1.15	4.17	9.30	16.96	8.68	9.74	10.69	11.11	13.92
Icos-1-enal	294	0.00	0.00	0.00	0.00	0.00	0.00	0.00	0.00	0.00	0.00	0.22	0.60	0.88	1.30	2.94	0.00	0.00	0.00	0.00	0.14
Icos-13-enal	294	0.00	0.00	0.00	0.00	0.00	0.00	0.00	0.00	0.00	0.00	0.55	2.03	2.56	3.73	9.39	0.00	0.00	0.00	0.00	0.56
Icos-15-enal	294	0.00	0.00	0.00	0.00	0.00	0.00	0.00	0.00	0.00	0.00	0.00	0.00	0.00	0.94	4.77	0.00	0.00	0.00	0.00	0.07
Henicosane	296	0.66	1.06	1.84	2.62	3.56	0.84	1.30	1.50	1.89	2.47	1.00	1.73	2.14	3.25	5.03	1.91	2.51	2.60	2.77	3.83
3-Methylicosane	296	0.00	0.00	0.00	0.00	0.00	0.00	0.03	0.07	0.11	0.25	0.00	0.00	0.00	0.00	0.00	0.00	0.00	0.00	0.00	0.00
Icosadienol	296	0.00	0.00	0.00	0.00	0.00	0.00	0.00	0.00	0.00	0.00	0.00	0.00	0.00	0.00	0.00	0.00	0.05	0.07	0.09	0.16
Octadecatrienyl acetate	306	0.00	0.00	0.00	0.00	0.00	0.11	0.81	0.97	1.18	2.22	0.00	0.00	0.00	0.00	0.00	0.00	0.28	0.37	0.47	0.63
Octadecadienyl acetate	308	0.00	0.00	0.00	0.00	0.00	0.00	0.66	0.73	0.95	2.09	0.00	0.00	0.00	0.00	0.00	0.00	0.40	0.48	0.61	0.86
Octadecadienyl acetate	308	0.00	0.00	0.17	0.80	3.32	0.00	0.00	0.00	0.00	0.00	0.00	0.00	0.00	0.00	0.00	0.00	0.00	0.00	0.00	0.00
Ethyl octadec-7-noate	310	0.00	0.00	0.00	0.00	0.00	0.84	1.08	1.20	1.80	3.07	0.00	0.00	0.00	0.00	0.00	0.00	0.00	0.00	0.00	0.00
Docosane	310	0.00	0.00	0.00	0.00	0.00	0.32	0.44	0.52	0.57	0.66	0.00	0.40	0.68	0.84	5.50	0.00	0.35	0.39	0.43	0.50
Icosene	310	0.00	0.00	0.00	0.00	0.00	0.00	0.00	0.00	0.00	0.00	0.40	0.64	1.25	1.65	10.06	0.00	0.00	0.00	0.00	0.46
Octadecyl acetate	312	0.00	0.00	0.00	0.00	0.00	0.00	0.00	0.00	0.06	0.92	0.00	0.00	0.00	0.00	0.00	0.00	0.04	0.06	0.06	0.06
Tricos-9-ene	322	0.00	0.14	0.56	1.66	2.24	0.38	0.80	0.96	1.17	1.52	0.00	1.15	1.79	3.08	4.89	2.33	2.60	2.89	2.97	4.98
Tricos-5-ene	322	0.00	0.00	0.00	0.00	0.00	0.00	0.12	0.35	0.91	2.21	0.00	0.00	0.00	0.00	1.82	6.48	7.86	9.02	9.44	15.24
Unknown Terrestris 5	?	0.00	0.00	0.00	0.00	0.00	0.00	0.00	0.00	0.00	0.00	0.00	0.00	0.00	0.00	0.00	0.00	1.05	1.50	1.90	2.09
Docosenal	322	0.00	0.00	0.00	0.00	0.00	0.00	0.00	0.00	0.00	0.00	0.00	0.00	0.47	0.85	2.27	0.00	0.00	0.00	0.00	0.12
Tricosane	324	0.23	0.97	5.47	12.84	15.38	2.86	4.91	5.80	6.29	7.21	2.65	6.06	7.25	11.45	18.67	4.43	5.17	5.74	6.39	17.38
Unknown Terrestris 6	?	0.00	0.00	0.00	0.00	0.00	0.00	0.00	0.00	0.00	0.00	0.00	0.00	0.00	0.00	0.00	0.00	0.03	0.05	0.06	0.07
Docos-17-enol	324	0.00	0.00	0.00	0.00	0.00	0.00	0.00	0.00	0.00	0.00	0.00	0.00	0.00	0.00	4.56	5.30	7.17	7.63	8.24	9.36
Geranylcitronellyl acetate	335	0.00	0.00	0.00	0.00	0.00	0.11	0.18	0.90	1.35	4.53	0.00	0.00	0.00	0.00	0.00	0.00	0.00	0.00	0.00	0.00
Tetracosene	336	0.00	0.00	0.00	0.38	0.45	0.00	0.00	0.00	0.04	0.10	0.00	0.00	0.17	0.43	2.94	0.00	0.00	0.00	0.00	0.09
Tetracosane	338	0.00	0.00	0.00	0.00	0.00	0.00	0.00	0.00	0.01	0.09	0.56	1.28	1.73	3.01	8.67	0.00	0.00	0.00	0.00	0.34
Icosyl acetate	340	0.00	0.00	0.00	0.00	0.00	0.00	0.00	0.21	0.42	0.85	0.00	0.00	0.00	0.00	0.00	0.00	0.00	0.00	0.00	0.00
Pentacos-9-ene	350	0.00	0.00	0.36	1.33	1.80	0.49	1.05	1.24	1.49	2.08	0.00	0.00	0.48	0.68	0.84	0.00	0.00	0.00	0.00	1.07
Pentacosane	352	0.00	0.05	0.87	2.46	3.82	1.58	2.08	2.37	2.53	2.77	0.00	0.00	0.98	1.52	10.26	0.80	1.32	1.63	2.12	3.45
Hexacosene	364	0.00	0.00	0.10	0.33	0.59	0.00	0.10	0.14	0.18	0.31	0.00	0.00	0.00	0.20	0.95	0.08	0.25	0.28	0.30	0.40
Methylpentacosane	366	0.00	0.00	0.00	0.00	0.34	0.00	0.00	0.00	0.00	0.00	0.00	0.00	0.00	0.00	0.00	0.00	0.00	0.00	0.00	0.00
Docosenyl acetate (isomer I)	366	0.00	0.00	0.00	0.04	0.25	0.00	0.00	0.00	0.00	0.00	0.00	0.00	0.00	0.00	0.00	0.00	0.00	0.00	0.00	0.00
Docos-15-enyl acetate	366	0.00	0.00	0.00	0.00	0.00	0.26	1.39	1.56	1.80	2.61	0.00	0.00	0.00	0.00	0.00	0.00	0.04	0.06	0.07	0.08
Hexacosane	366	0.00	0.00	0.00	0.00	0.00	0.00	0.11	0.22	0.30	0.48	0.00	0.94	1.69	2.37	7.64	0.00	0.01	0.02	0.02	0.03
Docosyl acetate	368	0.00	0.00	0.00	0.00	0.00	0.00	0.02	0.11	0.19	0.46	0.00	0.00	0.00	0.00	0.00	0.00	0.00	0.00	0.00	0.00
Heptacos-9-ene	378	0.08	0.10	1.06	3.07	5.55	1.40	1.78	2.09	2.31	3.18	0.00	0.98	1.87	2.41	3.91	1.36	2.63	3.27	3.60	3.76
Heptacosane	380	0.00	0.00	0.00	0.20	0.32	0.36	0.52	0.66	0.87	1.26	0.00	0.00	0.30	0.44	2.37	0.00	0.08	0.30	0.38	1.30
Octacosene	392	0.00	0.00	0.00	0.00	0.00	0.00	0.00	0.00	0.00	0.00	0.00	0.00	0.00	0.00	0.00	0.00	0.07	0.09	0.10	0.11
Icosenyl acetate (isomer I)	396	0.00	0.00	0.00	0.00	0.00	0.00	0.30	0.41	0.52	0.98	0.00	0.25	0.35	0.56	2.26	0.01	0.02	0.03	0.03	0.04
Icos-11-enyl acetate	396	0.00	0.00	0.00	0.00	0.00	0.56	1.36	1.96	2.20	4.88	0.00	0.00	0.00	0.00	0.00	0.00	0.18	0.20	0.24	0.27
2.3-Dihydrofarnesyl dodecanoate	406	0.17	0.36	2.69	6.05	12.14	9.63	17.90	21.32	25.66	28.88	0.00	0.00	0.00	0.00	0.00	0.00	0.00	0.00	0.00	0.00
Nonacos-9-ene	406	0.00	0.00	0.13	0.37	0.71	0.58	0.81	0.94	1.18	1.95	0.00	0.35	0.90	1.42	2.74	0.50	0.70	0.78	0.86	1.31
Unknown Terrestris 7	?	0.00	0.00	0.00	0.00	0.00	0.00	0.00	0.00	0.00	0.00	0.00	0.00	0.00	0.00	0.00	0.00	0.00	0.08	0.27	0.38
Nonacosane	408	0.00	0.00	0.00	0.00	0.00	0.00	0.00	0.00	0.10	0.19	0.00	0.00	0.00	0.00	0.23	0.00	0.05	0.10	0.26	0.32
Squalene	411	0.00	0.00	0.00	0.00	0.00	0.00	0.00	0.00	0.00	0.00	0.00	0.00	0.00	0.29	1.92	0.00	0.00	0.00	0.00	0.00
Unknown Terrestris 8	?	0.00	0.00	0.00	0.00	0.00	0.00	0.00	0.00	0.00	0.00	0.00	0.00	0.00	0.00	0.00	0.00	0.18	0.38	0.55	0.56
Hexacosenyl acetate (isomer I)	422	0.00	0.00	0.00	0.00	0.00	0.00	0.08	0.12	0.18	0.31	0.00	0.00	0.00	0.00	0.00	0.00	0.00	0.00	0.00	0.00
Hexacosenyl acetate (isomer II)	422	0.00	0.00	0.00	0.00	0.00	0.00	0.00	0.00	0.10	0.25	0.00	0.00	0.00	0.00	0.00	0.00	0.00	0.00	0.00	0.00
Hexadecyl dodecanoate	424	0.00	0.00	0.00	0.00	0.00	1.69	2.45	2.76	3.22	6.73	0.00	0.00	0.00	0.00	0.00	0.00	0.00	0.00	0.00	0.00
2.3-Dihydrofarnesyl tetradecenoate	432	0.08	0.21	0.64	1.58	3.19	0.00	0.00	0.00	0.00	0.00	0.00	0.78	1.15	1.68	2.74	0.00	0.00	0.00	0.00	0.35
2,3-Dihydrofarnesyl tetradecanoate	434	0.00	0.00	0.00	0.00	0.00	1.41	2.00	2.88	3.39	5.45	0.00	0.00	0.00	0.00	0.00	0.00	0.15	0.18	0.39	0.52
Hentriacontene	434	0.00	0.00	0.00	0.00	0.00	0.00	0.00	0.00	0.00	0.00	0.00	0.00	0.00	0.00	0.37	0.00	0.00	0.02	0.02	0.10
Octadecatrienyl dodecanoate	446	0.00	0.00	0.00	0.00	0.00	0.00	1.77	2.00	2.46	3.96	0.00	0.00	0.00	0.00	0.00	0.00	0.00	0.00	0.00	0.00
Octadecadienyl dodecanoate	448	0.00	0.00	0.00	0.00	0.00	0.00	0.37	0.61	0.75	1.04	0.00	0.00	0.00	0.00	0.00	0.00	0.00	0.00	0.00	0.00
2,3-Dihydrofarnesyl hexadecenoate (isomer I)	460	0.00	0.00	0.00	0.00	0.00	0.00	0.00	0.00	0.00	0.00	0.15	0.28	0.64	0.88	2.07	0.01	0.04	0.04	0.05	0.07
2.3-Dihydrofarnesyl hexadecenoate (isomer II)	460	0.00	0.00	0.01	0.05	0.14	0.00	0.00	0.00	0.00	0.00	0.00	0.00	0.00	0.00	0.00	0.00	0.00	0.00	0.00	0.00
2,3-Dihydrofarnesyl hexadecanoate	462	0.00	0.00	0.00	0.00	0.00	0.00	0.00	0.00	0.00	0.00	0.25	1.52	2.63	3.44	4.40	0.04	0.08	0.11	0.13	0.55
Geranylcitronellyl dodecanoate	474	0.00	0.00	0.00	0.00	0.00	0.00	1.42	1.96	2.08	4.42	0.00	0.00	0.00	0.00	0.00	0.00	0.00	0.00	0.00	0.00
Hexadecyl hexadecenoate	478	0.00	0.00	0.00	0.00	0.00	0.00	0.00	0.00	0.00	0.00	0.00	5.63	8.66	13.93	22.34	0.00	0.00	0.00	0.00	0.01
Hexadecyl hexadecanoate	480	0.00	0.00	0.00	0.00	0.00	0.00	0.00	0.00	0.00	0.00	0.00	0.00	0.00	0.63	3.39	0.00	0.00	0.00	0.00	0.01
2.3-Dihydrofarnesyl octadecenoate	488	0.00	0.01	0.05	0.07	0.12	0.00	0.00	0.00	0.00	0.00	0.00	0.00	0.00	0.08	3.43	0.00	0.00	0.00	0.00	0.61
Geranylcitronellyl tetradecanoate	498	0.00	0.00	0.04	0.14	0.44	0.00	0.00	0.00	0.00	0.00	0.00	0.00	0.00	0.00	0.00	0.00	0.00	0.00	0.00	0.00
Hexadecyl octadecatrienoate	502	0.00	0.00	0.00	0.00	0.00	0.00	0.00	0.00	0.00	0.00	0.00	0.00	0.00	0.00	0.22	0.00	0.00	0.00	0.00	0.01
Hexadecyl octadecenoate	504	0.00	0.00	0.00	0.00	0.00	0.00	0.00	0.00	0.00	0.00	0.00	10.49	11.82	17.36	28.72	0.00	0.00	0.00	0.00	0.01
Hexadecyl octadeaenoate	506	0.00	0.00	0.00	0.00	0.00	0.00	0.00	0.00	0.00	0.00	0.00	0.00	0.00	0.31	2.42	0.00	0.00	0.00	0.00	0.58
